# Supplementary material
Source: publisher figshare collection journal article supplement (https://gsajournals.figshare.com/ndownloader/files/11300201)
Supplement: Supplementary file 1 [file 11300201]

## Sheet: Sheet1
SNP ID	Minor Allele	Major Allele	Reference Allele	Minor Allele Frequency	Minor Allele Count	Major Allele Count	Regular Food P-value	Ethanol Food P-value	Sensitivity P-value	Gene 1 FlyBase ID	Gene 1 Symbol	Gene 1 Site Class	Gene 1 Position (bp)	Gene2 FlyBase ID	Gene 2 Symbol	Gene 2 Site Class	Gene 2 Position (bp)
3L_9299935_SNP	T	A	A	0.4974	96	97	0.00012877	0.256932	5.93491e-07	INTERGENIC		INTERGENIC
3L_12884397_SNP	T	C	C	0.2539	49	144	0.170741	0.000129255	6.05486e-07	FBgn0264486	CG43894	DOWNSTREAM	192
3L_14213985_INS	CCT	G	G	0.05076	10	187	0.00104303	0.0951667	7.52908e-07	FBgn0013718	nuf	INTRON	0
2R_17896299_DEL	TT	T	TT	0.2033	37	145	0.00499228	0.0464736	1.8942e-06	FBgn0085399	CG34370	INTRON	0
X_19902955_SNP	T	C	T	0.2747	50	132	0.000372312	0.237033	1.9481e-06	FBgn0053517	Dop2R	INTRON	0
3R_18024211_SNP	A	T	T	0.1538	30	165	0.00449606	0.0626189	2.97072e-06	FBgn0266751	CR45224	INTRON	0	FBgn0051163	SKIP	INTRON	0
2R_11417974_SNP	A	T	A	0.4583	88	104	0.000172526	0.381382	3.1749e-06	FBgn0019968	Khc-73	INTRON	0
2R_11303714_SNP	G	A	G	0.4973	92	93	0.0322332	0.00993277	3.75061e-06	FBgn0263980	CG43729	INTRON	0
X_19902916_SNP	C	G	G	0.4845	78	83	0.0316054	0.011342	4.46807e-06	FBgn0053517	Dop2R	INTRON	0
3L_2571858_INS	T	TT	T	0.2447	46	142	0.000153417	0.445002	4.67842e-06	FBgn0010909	msn	INTRON	0
X_8333841_SNP	C	A	A	0.254	48	141	0.0785706	0.00313762	4.7481e-06	FBgn0030038	CG1440	INTRON	0
2L_6588001_SNP	A	C	A	0.2011	36	143	0.0255612	0.016007	5.16055e-06	FBgn0031835	CG11319	INTRON	0
3R_18024127_SNP	A	C	C	0.1429	28	168	0.0148211	0.0310071	5.86916e-06	FBgn0266751	CR45224	INTRON	0	FBgn0051163	SKIP	INTRON	0
3R_18024299_SNP	A	C	C	0.1414	27	164	0.007327	0.0601868	6.17059e-06	FBgn0266751	CR45224	INTRON	0	FBgn0051163	SKIP	INTRON	0
3L_10791714_SNP	A	T	T	0.06633	13	183	0.275402	0.000297093	7.30003e-06	INTERGENIC		INTERGENIC
3L_11756174_SNP	G	A	A	0.1856	36	158	0.0233693	0.0233149	8.25404e-06	FBgn0036202	CG6024	INTRON	0
2R_13550600_SNP	C	G	G	0.135	27	173	0.00159514	0.194623	8.58064e-06	FBgn0050106	CCHa1-R	INTRON	0
3R_18024268_SNP	A	T	T	0.1429	27	162	0.0115621	0.0485645	8.78125e-06	FBgn0266751	CR45224	INTRON	0	FBgn0051163	SKIP	INTRON	0
2L_8390625_SNP	C	T	T	0.3936	74	114	0.521923	4.2838e-05	9.00895e-06	FBgn0262002	CG42820	SYNONYMOUS_CODING	0	FBgn0041717	snRNA:U6atac:29B	DOWNSTREAM	805
3L_10508710_INS	AG	A	A	0.3608	70	124	0.0841379	0.0048	1.02115e-05	FBgn0052062	A2bp1	INTRON	0
3R_25645293_SNP	T	A	A	0.08543	17	182	0.0112367	0.0586186	1.20614e-05	FBgn0039704	neo	INTRON	0
3L_6859105_SNP	G	A	A	0.05	10	190	0.0121797	0.0559317	1.26307e-05	FBgn0266590	CR45115	EXON	0
3R_23521103_SNP	C	A	A	0.4737	90	100	0.0757074	0.00724889	1.45345e-05	FBgn0263025	CG43320	NON_SYNONYMOUS_CODING	0	FBgn0263597	Acp98AB	DOWNSTREAM	330
3R_18024281_SNP	C	T	T	0.1361	26	165	0.0199562	0.0381732	1.47368e-05	FBgn0266751	CR45224	INTRON	0	FBgn0051163	SKIP	INTRON	0
3L_4045930_SNP	A	G	G	0.1082	21	173	0.0139191	0.0548481	1.53035e-05	FBgn0035490	CG1136	UPSTREAM	666
2L_4306189_SNP	A	C	C	0.3793	66	108	0.0300998	0.025424	1.55323e-05	FBgn0010473	tutl	DOWNSTREAM	494
2R_12918620_SNP	T	G	G	0.2984	57	134	0.0489726	0.0141347	1.56609e-05	FBgn0023172	RhoGEF2	INTRON	0
2L_2667045_SNP	G	A	A	0.3613	69	122	0.0436343	0.0166455	1.60342e-05	FBgn0031444	CG9879	DOWNSTREAM	780
2R_9813614_SNP	T	A	A	0.2461	47	144	0.00618335	0.113286	1.78105e-05	FBgn0013733	shot	INTRON	0
3L_10866691_SNP	A	T	A	0.4197	81	112	0.0010068	0.320583	1.79251e-05	FBgn0026160	tna	INTRON	0
2L_6786346_SNP	T	G	G	0.1005	19	170	4.64169e-05	0.882545	2.00004e-05	FBgn0015776	nrv1	SYNONYMOUS_CODING	0
2R_11418492_SNP	C	T	T	0.4216	78	107	6.29129e-05	0.830735	2.06999e-05	FBgn0019968	Khc-73	INTRON	0
2R_12917627_SNP	A	G	G	0.2222	44	154	0.109869	0.00514713	2.10643e-05	FBgn0023172	RhoGEF2	INTRON	0
3R_23521117_SNP	C	T	T	0.4439	83	104	0.0436992	0.0196975	2.10801e-05	FBgn0263025	CG43320	SYNONYMOUS_CODING	0	FBgn0263597	Acp98AB	DOWNSTREAM	344
3L_11756201_SNP	C	A	A	0.1897	37	158	0.0407437	0.0215339	2.1204e-05	FBgn0036202	CG6024	INTRON	0
2L_6543480_SNP	A	G	G	0.2766	52	136	0.00310894	0.192757	2.17735e-05	FBgn0000320	eya	INTRON	0
2R_10410795_SNP	T	G	G	0.1231	24	171	0.000837814	0.373852	2.22906e-05	INTERGENIC		INTERGENIC
3R_7654761_SNP	T	C	C	0.1768	32	149	0.0081925	0.105681	2.38608e-05	FBgn0037956	CG6959	INTRON	0
X_18524862_SNP	T	C	T	0.48	96	104	0.000286995	0.568089	2.39585e-05	FBgn0030941	wgn	INTRON	0
3L_21133818_SNP	C	T	T	0.3372	58	114	0.00559941	0.142676	2.55332e-05	FBgn0024150	Ac78C	SYNONYMOUS_CODING	0
3L_768586_SNP	G	T	T	0.1061	21	177	0.024559	0.042082	2.55607e-05	FBgn0052480	tRNA:CR32480	UPSTREAM	917
3R_23529975_SNP	C	A	A	0.467	85	97	0.111306	0.00581985	2.57329e-05	FBgn0039543	CG12428	NON_SYNONYMOUS_CODING	0	FBgn0045862	btz	DOWNSTREAM	808
3L_10405258_SNP	C	A	A	0.07035	14	185	0.0269697	0.0384533	2.58383e-05	FBgn0264722	CR43990	EXON	0	FBgn0036082	CG12362	UPSTREAM	660
2L_20025090_SNP	G	T	T	0.05208	10	182	0.0275697	0.0376659	2.59439e-05	FBgn0032839	CG10659	UTR_3_PRIME	0
3L_768428_SNP	G	T	T	0.1558	31	168	0.0655525	0.0135005	2.68005e-05	INTERGENIC		INTERGENIC
3L_9787110_SNP	G	A	A	0.1407	28	171	0.0290238	0.0364119	2.68841e-05	FBgn0036044	Zasp67	INTRON	0
3R_18024204_SNP	T	G	G	0.1399	27	166	0.0275755	0.038482	2.69468e-05	FBgn0051163	SKIP	INTRON	0	FBgn0266751	CR45224	INTRON	0
X_19647084_SNP	G	C	C	0.2183	43	154	0.00987246	0.0975301	2.71509e-05	FBgn0031069	Pmp70	INTRON	0
2L_3452708_SNP	G	A	A	0.1685	31	153	0.00704184	0.125518	2.72695e-05	FBgn0031535	CG12795	INTRON	0	FBgn0031534	Snx1	DOWNSTREAM	602
X_21910584_INS	TT	T	T	0.1313	26	172	0.00109443	0.356835	2.73638e-05	FBgn0027279	l_1_G0196	DOWNSTREAM	620
2L_4305977_SNP	A	G	G	0.3722	67	113	0.111812	0.00615472	2.80981e-05	FBgn0010473	tutl	DOWNSTREAM	282
2L_17256795_SNP	T	A	A	0.1609	28	146	0.0142691	0.0745811	2.89354e-05	FBgn0032629	beat-IIIc	INTRON	0
2L_8390736_SNP	T	C	C	0.385	72	115	0.33058	0.00061642	2.97641e-05	FBgn0262002	CG42820	SYNONYMOUS_CODING	0	FBgn0041717	snRNA:U6atac:29B	DOWNSTREAM	916
2R_19939336_INS	T	TAA	T	0.3446	61	116	0.00142964	0.327064	3.01458e-05	FBgn0003353	sei	INTRON	0
3L_10309320_SNP	T	G	G	0.399	77	116	0.000387114	0.552337	3.08603e-05	INTERGENIC		INTERGENIC
3L_8073568_SNP	T	C	C	0.4103	80	115	0.0758511	0.0120799	3.09433e-05	FBgn0262579	Ect4	INTRON	0
2R_19939334_SNP	C	A	C	0.3258	58	120	0.00164181	0.313171	3.20375e-05	FBgn0003353	sei	INTRON	0
3R_18024212_DEL	G	GCAGAGAGA	GCAGAGAGA	0.1354	26	166	0.0516268	0.0212709	3.32467e-05	FBgn0266751	CR45224	INTRON	0	FBgn0051163	SKIP	INTRON	0
2R_17845543_SNP	T	C	C	0.09548	19	180	0.000324168	0.609135	3.57252e-05	INTERGENIC		INTERGENIC
2R_10629995_SNP	G	C	C	0.1071	21	175	0.00336476	0.226711	3.64438e-05	FBgn0033958	CG12858	SYNONYMOUS_CODING	0
X_4105014_SNP	G	T	G	0.4718	92	103	0.0377798	0.033222	3.75876e-05	INTERGENIC		INTERGENIC
2R_20223052_DEL	C	CT	CT	0.06736	13	180	0.00767972	0.137299	3.79141e-05	FBgn0265309	CR44282	EXON	0
2R_17287477_SNP	A	G	G	0.4255	80	108	0.00397548	0.209425	3.79605e-05	FBgn0010415	Sdc	INTRON	0
2L_11896841_SNP	A	G	G	0.06061	12	186	0.0124099	0.0964081	3.83292e-05	FBgn0264815	Pde1c	INTRON	0
X_19878711_SNP	G	A	A	0.05556	11	187	0.00683817	0.150645	3.90215e-05	INTERGENIC		INTERGENIC
2R_18550922_SNP	C	A	C	0.08629	17	180	0.000910805	0.438055	4.04116e-05	FBgn0260768	CG42566	DOWNSTREAM	176	FBgn0034761	CG4250	UPSTREAM	275
2L_6468348_SNP	A	G	G	0.1005	19	170	0.0810997	0.0134059	4.16726e-05	FBgn0259749	mmy	DOWNSTREAM	190	FBgn0031817	CG9531	UPSTREAM	650
3L_3689989_SNP	T	G	G	0.3316	64	129	0.0319819	0.0423775	4.18153e-05	FBgn0263495	CR43484	DOWNSTREAM	580
X_4105009_SNP	G	A	G	0.4694	92	104	0.0318404	0.0426122	4.18778e-05	INTERGENIC		INTERGENIC
X_21910588_SNP	C	T	T	0.1269	25	172	0.00203489	0.311516	4.20181e-05	FBgn0027279	l_1_G0196	DOWNSTREAM	623
2R_16217207_SNP	T	C	C	0.1495	29	165	0.238195	0.00194987	4.32686e-05	FBgn0034504	CG8929	INTRON	0
X_22127134_SNP	G	T	G	0.2487	48	145	0.0284805	0.0491822	4.40262e-05	FBgn0266348	CR44997	INTRON	0
3L_770528_SNP	G	T	T	0.2081	41	156	0.0679321	0.0179078	4.4375e-05	FBgn0052481	tRNA:CR32481	DOWNSTREAM	66	FBgn0052480	tRNA:CR32480	DOWNSTREAM	928
3L_768427_SNP	A	C	C	0.1608	32	167	0.0953367	0.0110517	4.46696e-05	INTERGENIC		INTERGENIC
3L_7863679_SNP	T	A	A	0.199	39	157	0.0565719	0.0231974	4.57719e-05	FBgn0052365	CG32365	INTRON	0
X_18519412_SNP	G	A	A	0.3618	72	127	0.000714424	0.501057	4.61674e-05	FBgn0030941	wgn	INTRON	0
2L_20877879_SNP	T	A	A	0.4254	77	104	0.000362322	0.634837	4.74008e-05	FBgn0032901	sky	INTRON	0	FBgn0263996	CG43739	INTRON	0
X_19647018_SNP	C	T	T	0.3655	72	125	0.000603222	0.537007	4.75027e-05	FBgn0031069	Pmp70	INTRON	0
3L_12879529_SNP	C	A	A	0.09645	19	178	0.0100706	0.125898	4.78042e-05	FBgn0036321	CG14120	NON_SYNONYMOUS_CODING	0
X_19878686_SNP	A	T	T	0.05729	11	181	0.00768828	0.153071	4.82548e-05	INTERGENIC		INTERGENIC
X_6644141_SNP	T	C	C	0.05051	10	188	0.0301321	0.0489951	4.83807e-05	FBgn0029898	CG14439	INTRON	0
2L_8472966_SNP	T	C	C	0.3085	58	130	0.00120091	0.416091	4.8805e-05	FBgn0262029	d	INTRON	0
3R_21496299_SNP	T	C	C	0.06091	12	185	0.0235689	5.29899e-08	0.0101205	FBgn0039354	Lgr3	INTRON	0
3R_23513275_SNP	G	A	A	0.08718	17	178	0.0454977	1.587e-07	0.00753083	FBgn0051055	CG31055	SYNONYMOUS_CODING	0	FBgn0046258	CG12880	INTRON	0
2R_17449693_SNP	T	G	G	0.05525	10	171	0.0844286	2.73449e-07	0.00413539	FBgn0034636	CG10440	SYNONYMOUS_CODING	0
2R_17268490_SNP	A	G	G	0.4202	79	109	0.327035	3.14381e-07	0.000290706	INTERGENIC		INTERGENIC
3L_11370995_SNP	A	C	C	0.1231	24	171	0.0224755	3.35873e-07	0.0234358	INTERGENIC		INTERGENIC
2R_20110617_SNP	A	G	G	0.08808	17	176	0.0552249	3.7046e-07	0.00874871	FBgn0050419	CG30419	INTRON	0
2L_13674905_SNP	A	G	G	0.4686	82	93	0.00933231	4.33064e-07	0.0566137	INTERGENIC		INTERGENIC
2R_17180764_SNP	A	G	G	0.1684	33	163	0.0187857	4.83158e-07	0.0324173	FBgn0050390	Sgf29	SYNONYMOUS_CODING	0	FBgn0016726	RpL29	UPSTREAM	509
3R_18711783_SNP	T	C	T	0.06633	13	183	0.160192	8.7417e-07	0.00263536	INTERGENIC		INTERGENIC
3R_13309363_SNP	G	C	C	0.06771	13	179	0.0493233	1.00115e-06	0.0160755	FBgn0261046	Dscam3	INTRON	0
3L_13861834_SNP	T	G	G	0.05612	11	185	0.0292749	1.06357e-06	0.0292678	FBgn0264006	dysc	UTR_3_PRIME	0
3L_19145852_SNP	T	A	A	0.07216	14	180	0.0792563	1.4142e-06	0.0103619	FBgn0016797	fz2	INTRON	0
3R_23521303_SNP	T	C	C	0.07979	15	173	0.189026	1.51762e-06	0.00264013	FBgn0263025	CG43320	SYNONYMOUS_CODING	0	FBgn0263597	Acp98AB	DOWNSTREAM	530
2R_16366345_SNP	G	A	A	0.1895	36	154	0.24706	1.80995e-06	0.0016993	FBgn0086604	CG12484	UTR_3_PRIME	0
2R_19105254_SNP	A	G	G	0.1042	20	172	0.0758073	2.00266e-06	0.0130597	INTERGENIC		INTERGENIC
3L_3312145_SNP	A	G	G	0.05051	10	188	0.119833	2.25953e-06	0.00721583	FBgn0035432	ZnT63C	SYNONYMOUS_CODING	0
3R_23521234_SNP	T	C	C	0.07732	15	179	0.0490569	2.29917e-06	0.0237124	FBgn0263025	CG43320	SYNONYMOUS_CODING	0	FBgn0263597	Acp98AB	DOWNSTREAM	461
2L_4957860_SNP	T	C	C	0.1244	24	169	0.0604665	2.39274e-06	0.0189237	FBgn0031655	Marcal1	SYNONYMOUS_CODING	0	FBgn0083960	CG34124	UPSTREAM	551
3R_26085875_DEL	A	AGCCCTCACCCTCTGA	AGCCCTCACCCTCTGA	0.1269	25	172	0.00453787	2.67511e-06	0.172628	INTERGENIC		INTERGENIC
2R_17181037_SNP	T	A	A	0.1647	28	142	0.0179544	2.98468e-06	0.0696965	FBgn0050390	Sgf29	UPSTREAM	91	FBgn0016726	RpL29	UPSTREAM	236
2L_4957790_SNP	C	T	T	0.1276	25	171	0.140382	3.09572e-06	0.00664229	FBgn0031655	Marcal1	SYNONYMOUS_CODING	0	FBgn0083960	CG34124	UPSTREAM	621
3R_24084181_SNP	G	A	A	0.3408	61	118	0.00857663	3.34614e-06	0.125452	INTERGENIC		INTERGENIC
X_4036785_SNP	C	T	T	0.1327	26	170	0.00327864	3.83253e-06	0.230192	FBgn0000635	Fas2	SYNONYMOUS_CODING	0
X_2615539_SNP	C	A	A	0.05556	11	187	0.0462344	4.10374e-06	0.0328896	FBgn0000928	fs_1_Yb	NON_SYNONYMOUS_CODING	0
2R_12392094_INS	CACCCCCCA	C	C	0.1436	27	161	0.216086	4.25422e-06	0.00370536	FBgn0011260	Sema-2a	INTRON	0
2R_16367149_SNP	A	T	T	0.1875	36	156	0.248467	4.52102e-06	0.00290897	FBgn0086604	CG12484	DOWNSTREAM	693
2R_15203629_SNP	T	A	A	0.172	32	154	0.0806441	4.62936e-06	0.0181714	FBgn0264753	Rgk1	INTRON	0
3L_14373121_SNP	C	A	A	0.25	48	144	0.0269375	5.16496e-06	0.0613892	INTERGENIC		INTERGENIC
2R_6150269_SNP	T	A	A	0.2169	41	148	0.152645	5.37998e-06	0.0078279	FBgn0050009	CR30009	EXON	0
3L_5055565_INS	CGCCCACAATTCAATGGC	C	C	0.05848	10	161	0.000234559	5.67406e-06	0.680557	FBgn0005775	Con	INTRON	0
3R_3482868_SNP	T	A	A	0.1517	27	151	0.0756495	5.71509e-06	0.0218162	INTERGENIC		INTERGENIC
2R_14086294_SNP	A	G	G	0.4339	82	107	0.0358854	5.80728e-06	0.0494817	INTERGENIC		INTERGENIC
3R_23642266_SNP	A	T	T	0.05612	11	185	0.313068	6.03549e-06	0.00210468	FBgn0085382	CG34353	INTRON	0
3L_4210588_SNP	T	A	A	0.1865	36	157	0.0540798	6.19904e-06	0.033463	FBgn0263110	CG43367	INTRON	0	FBgn0035511	Cpr64Ab	DOWNSTREAM	292
X_11897616_SNP	T	A	A	0.1156	23	176	0.0156588	6.63182e-06	0.105152	FBgn0001083	fw	INTRON	0
2L_17238987_SNP	G	A	A	0.2703	50	135	0.0104893	7.25317e-06	0.143754	FBgn0032629	beat-IIIc	INTRON	0
2R_17181180_SNP	A	G	G	0.1443	28	166	0.197909	7.60507e-06	0.0060993	FBgn0050390	Sgf29	UPSTREAM	29	FBgn0016726	RpL29	UPSTREAM	93
3R_13309370_SNP	T	C	C	0.07179	14	181	0.062789	8.02157e-06	0.0319241	FBgn0261046	Dscam3	INTRON	0
2R_12384712_SNP	G	A	G	0.1475	27	156	0.0162877	8.39992e-06	0.111548	FBgn0034133	CG7813	SYNONYMOUS_CODING	0
3L_7191255_SNP	C	A	A	0.2143	42	154	0.158415	8.62975e-06	0.00954387	INTERGENIC		INTERGENIC
2R_16368501_INS	CC	C	C	0.1222	22	158	0.232623	8.76075e-06	0.0049095	INTERGENIC		INTERGENIC
2L_13326271_SNP	G	C	G	0.2784	49	127	0.50009	8.84129e-06	0.000798289	FBgn0264308	CG43778	INTRON	0
3L_12656751_SNP	A	C	C	0.05528	11	188	0.0530709	8.95721e-06	0.0403539	INTERGENIC		INTERGENIC
2L_17350223_SNP	C	G	G	0.07407	14	175	0.0263591	9.14263e-06	0.0788594	INTERGENIC		INTERGENIC
2R_16484000_SNP	C	T	T	0.1031	20	174	0.0308034	9.15898e-06	0.0689735	FBgn0015907	bl	INTRON	0
2R_16129757_SNP	C	T	T	0.4947	94	96	0.00838777	9.21994e-06	0.179764	FBgn0034487	Efhc1.2	SYNONYMOUS_CODING	0	FBgn0034488	CG11208	DOWNSTREAM	500
3L_4210489_SNP	T	C	C	0.1929	38	159	0.0399402	9.47804e-06	0.0550828	FBgn0263110	CG43367	INTRON	0	FBgn0035511	Cpr64Ab	DOWNSTREAM	391
2R_11423226_SNP	A	G	A	0.4868	92	97	2.94256e-08	0.070204	0.0001404	FBgn0050471	CG30471	SYNONYMOUS_CODING	0
3L_12420221_SNP	A	T	T	0.1941	33	137	1.06273e-07	0.0348986	0.000947048	FBgn0036285	toe	INTRON	0
3L_5887986_SNP	T	A	T	0.2448	47	145	3.29272e-07	0.024911	0.00286301	FBgn0035644	Pole2	DOWNSTREAM	805
3L_12420195_SNP	G	T	T	0.2081	41	156	8.94346e-07	0.0849144	0.0010117	FBgn0036285	toe	INTRON	0
3L_12420217_SNP	T	G	G	0.3041	59	135	9.33643e-07	0.0932086	0.000897039	FBgn0036285	toe	INTRON	0
3L_7935836_SNP	T	A	T	0.2526	49	145	1.44071e-06	0.000307819	0.140694	INTERGENIC		INTERGENIC
3L_12420207_SNP	A	G	G	0.2953	57	136	1.46289e-06	0.14072	0.000602218	FBgn0036285	toe	INTRON	0
3L_10859563_SNP	C	T	C	0.05025	10	189	1.69032e-06	0.00920678	0.0189628	FBgn0026160	tna	INTRON	0
2R_18191669_SNP	C	A	A	0.08122	16	181	1.89898e-06	0.131097	0.000822832	FBgn0034718	wdp	INTRON	0
3L_12420214_SNP	T	A	A	0.2458	44	135	2.01589e-06	0.153871	0.000642319	FBgn0036285	toe	INTRON	0
2R_7566119_SNP	T	C	C	0.09836	18	165	2.04223e-06	0.0374373	0.00521783	FBgn0044020	Roc2	INTRON	0	FBgn0033644	Tret1-2	DOWNSTREAM	600
3R_18253152_SNP	A	G	G	0.4641	84	97	2.60438e-06	0.0641074	0.00307172	FBgn0038967	CG13847	SYNONYMOUS_CODING	0
2L_16228532_INS	ATTTATAAATCTTTTCAGATGAGTACGTTTAGTTTGGTAATTTGAAT	A	A	0.05882	11	176	2.93467e-06	0.442496	7.12375e-05	INTERGENIC		INTERGENIC
3L_14295863_SNP	A	T	T	0.4706	88	99	4.29404e-06	0.073805	0.00349144	FBgn0001085	fz	INTRON	0
3L_13279996_INS	ATGGAAA	A	A	0.125	20	140	4.35616e-06	0.290484	0.000303854	FBgn0267317	CR45753	EXON	0
2R_18947747_SNP	C	T	T	0.1719	33	159	4.93747e-06	0.0088038	0.0337035	FBgn0265187	CG44252	SYNONYMOUS_CODING	0
3L_2599571_SNP	C	T	C	0.4747	94	104	5.12276e-06	0.134773	0.00157486	FBgn0028504	CG12182	UTR_5_PRIME	0	FBgn0035355	CG16985	INTRON	0
3L_7719626_SNP	T	G	G	0.1846	36	159	5.35589e-06	0.0230374	0.0152978	FBgn0052373	CG32373	INTRON	0	FBgn0035812	CG7457	UPSTREAM	53
3L_14295762_SNP	C	G	G	0.462	85	99	5.61013e-06	0.113832	0.0022059	FBgn0001085	fz	INTRON	0
3R_24871462_SNP	T	G	G	0.1134	22	172	6.55791e-06	0.0235125	0.0167791	FBgn0003093	Pkc98E	INTRON	0
2R_15905759_SNP	A	G	A	0.3228	61	128	6.59156e-06	0.0143077	0.026351	INTERGENIC		INTERGENIC
3L_8943574_INS	AT	A	A	0.4318	76	100	7.05263e-06	0.0774965	0.00449847	FBgn0264307	orb2	INTRON	0	FBgn0264305	CG43783	INTRON	0
X_12455155_DEL	AA	A	AA	0.3864	68	108	7.92209e-06	0.0231535	0.0188987	FBgn0264542	CG43921	INTRON	0
3L_12420202_SNP	T	C	C	0.3141	60	131	8.47582e-06	0.0557293	0.00769962	FBgn0036285	toe	INTRON	0
X_17577906_SNP	T	C	C	0.06633	13	183	8.90333e-06	0.011066	0.0378616	FBgn0263258	chas	INTRON	0
3L_14295781_DEL	A	AT	AT	0.4722	85	95	9.39479e-06	0.224805	0.000959042	FBgn0001085	fz	INTRON	0
3R_18253146_SNP	T	G	G	0.4457	82	102	1.13964e-05	0.113642	0.00357966	FBgn0038967	CG13847	SYNONYMOUS_CODING	0
2R_9941354_SNP	G	T	T	0.08673	17	179	1.17574e-05	0.132565	0.00288411	FBgn0002643	mam	INTRON	0
3L_5899208_SNP	T	C	C	0.06701	13	181	1.2201e-05	0.305823	0.000608183	FBgn0035647	CG10486	SYNONYMOUS_CODING	0
3L_14295904_SNP	A	C	C	0.4709	89	100	1.41444e-05	0.0347051	0.0176144	FBgn0001085	fz	INTRON	0
X_12767520_SNP	G	A	G	0.1117	22	175	1.43131e-05	0.26091	0.000974249	FBgn0259171	Pde9	INTRON	0
3L_7719617_SNP	T	C	C	0.1939	38	158	1.48311e-05	0.0170864	0.0346425	FBgn0052373	CG32373	INTRON	0	FBgn0035812	CG7457	UPSTREAM	44
2R_12247101_SNP	A	G	G	0.3627	70	123	1.63843e-05	0.00382168	0.10297	FBgn0266861	CR45322	UPSTREAM	101	FBgn0034121	CG6262	UPSTREAM	134
X_1188254_SNP	C	G	G	0.08586	17	181	1.67397e-05	0.0191345	0.0335615	FBgn0025641	DAAM	SYNONYMOUS_CODING	0
2L_6934918_SNP	G	A	A	0.1186	23	171	1.75696e-05	0.00799231	0.0668234	FBgn0031869	CG18304	INTRON	0
2R_19111038_DEL	G	GG	GG	0.1211	23	167	1.78389e-05	0.20671	0.00181718	INTERGENIC		INTERGENIC
2R_9931296_SNP	T	C	C	0.3403	65	126	1.84763e-05	0.0633183	0.0106834	FBgn0002643	mam	INTRON	0
3L_18445868_SNP	C	T	C	0.06122	12	184	2.00148e-05	0.0112564	0.055861	INTERGENIC		INTERGENIC
3L_14295773_SNP	G	T	T	0.4689	83	94	2.04333e-05	0.143648	0.00372687	FBgn0001085	fz	INTRON	0
2L_21223578_SNP	G	A	A	0.09326	18	175	2.10506e-05	0.0229873	0.0323689	FBgn0026577	CG8677	SYNONYMOUS_CODING	0
3L_8796170_SNP	T	A	A	0.08205	16	179	2.2373e-05	0.0109502	0.0601819	FBgn0085455	CG34426	SYNONYMOUS_CODING	0	FBgn0052023	CG32023	DOWNSTREAM	532
2R_17483401_SNP	A	T	T	0.3608	70	124	2.28997e-05	0.0170659	0.0434418	INTERGENIC		INTERGENIC
2R_8333193_SNP	C	T	T	0.4277	74	99	2.35724e-05	0.143895	0.00410473	FBgn0033739	Dyb	INTRON	0
X_17576563_SNP	T	C	C	0.07576	15	183	2.4286e-05	0.00461217	0.109493	FBgn0263258	chas	INTRON	0
2R_18726534_SNP	A	T	T	0.2245	44	152	2.46623e-05	0.1565	0.00370841	FBgn0034783	CG9825	INTRON	0
3L_12078311_SNP	C	T	T	0.1399	27	166	2.54459e-05	0.69543	0.000106028	INTERGENIC		INTERGENIC
2R_19110988_SNP	G	A	A	0.1168	23	174	2.59997e-05	0.138723	0.00464817	INTERGENIC		INTERGENIC
2L_16374911_SNP	A	G	G	0.1667	29	145	2.67045e-05	0.602824	0.000183687	INTERGENIC		INTERGENIC
3L_19180226_SNP	G	T	G	0.1518	29	162	2.99998e-05	0.0152194	0.0545329	FBgn0016797	fz2	INTRON	0
3L_5888194_SNP	G	A	G	0.3523	68	125	3.0758e-05	0.0152551	0.0551248	FBgn0035644	Pole2	DOWNSTREAM	597
2R_18720921_SNP	T	G	G	0.1598	27	142	3.08471e-05	0.0368292	0.0258978	FBgn0050265	CG30265	SYNONYMOUS_CODING	0
X_11794702_SNP	C	G	G	0.1256	25	174	3.08927e-05	0.567069	0.000255029	FBgn0030354	Upf1	UTR_3_PRIME	0	FBgn0260780	wisp	DOWNSTREAM	749
3R_5660470_SNP	A	T	T	0.2418	44	138	3.13734e-05	0.0949754	0.00900888	FBgn0037766	Teh1	INTRON	0
3L_7839918_SNP	T	A	T	0.4375	84	108	3.17968e-05	0.0114185	0.0692941	FBgn0016694	Pdp1	INTRON	0
2R_15905848_SNP	T	C	T	0.3529	66	121	3.2227e-05	0.00429357	0.128863	INTERGENIC		INTERGENIC
2R_11045154_SNP	C	G	G	0.05528	11	188	3.30017e-05	0.129579	0.00605998	FBgn0013467	igl	INTRON	0
X_12794044_SNP	G	A	A	0.08629	17	180	3.41389e-05	0.0448121	0.0225892	FBgn0052649	CG32649	SYNONYMOUS_CODING	0
2R_17852052_SNP	A	G	G	0.268	52	142	3.43889e-05	0.00687483	0.100533	FBgn0085398	ppk9	SYNONYMOUS_CODING	0
2R_17113585_SNP	T	C	C	0.2961	53	126	3.47606e-05	0.0590405	0.0170335	FBgn0034606	ASPP	INTRON	0
3R_18430555_SNP	T	C	C	0.06283	12	179	3.51059e-05	0.0985234	0.00923603	FBgn0051158	Efa6	SYNONYMOUS_CODING	0
X_1190617_DEL	C	CAACC	CAACC	0.07071	14	184	3.58072e-05	0.0178486	0.052751	FBgn0025641	DAAM	INTRON	0
2L_8933754_SNP	A	G	G	0.1546	30	164	3.58809e-05	0.0110087	0.0753537	FBgn0085427	CG34398	DOWNSTREAM	160	FBgn0032074	Tsp29Fa	UPSTREAM	208
2R_17653469_SNP	C	A	A	0.06186	12	182	3.66508e-05	0.0413582	0.0255078	FBgn0050395	CG30395	INTRON	0	FBgn0264716	CR43984	UPSTREAM	669
3L_12075267_INS	T	TTT	T	0.3277	58	119	3.688e-05	0.0102475	0.0801875	FBgn0250876	Sema-5c	UPSTREAM	338
X_15479915_SNP	T	C	C	0.148	29	167	3.7088e-05	0.00290898	0.16797	FBgn0030662	CG9220	UTR_3_PRIME	0	FBgn0030660	CG8097	DOWNSTREAM	633
X_8873598_SNP	T	C	C	0.1582	31	165	3.82688e-05	0.0335966	0.0318932	FBgn0264384	CR43836	EXON	0	FBgn0261549	rdgA	INTRON	0
2R_17941614_SNP	T	G	G	0.07216	14	180	3.84369e-05	0.0428215	0.0253265	INTERGENIC		INTERGENIC
3R_24910783_SNP	C	T	T	0.1237	23	163	3.92638e-05	0.00664289	0.108986	FBgn0039633	CG11873	INTRON	0
X_4940831_SNP	C	T	T	0.09	18	182	4.13571e-05	0.0830139	0.0127532	FBgn0266096	CR44833	INTRON	0
2L_21258149_SNP	C	T	T	0.09043	17	171	4.14921e-05	0.0575427	0.0194903	FBgn0261239	Hr39	UTR_3_PRIME	0
2R_15928532_SNP	A	G	G	0.2165	42	152	4.18848e-05	0.000747251	0.316938	INTERGENIC		INTERGENIC
X_5680229_SNP	A	T	T	0.1071	21	175	4.24294e-05	0.1232	0.00772153	FBgn0261610	CG42699	INTRON	0
X_17454046_SNP	T	G	G	0.1399	27	166	4.3632e-05	0.15772	0.00546318	FBgn0263706	CG43658	INTRON	0
3L_5898035_SNP	A	T	T	0.08122	16	181	4.43736e-05	0.165084	0.00514717	FBgn0035647	CG10486	NON_SYNONYMOUS_CODING	0	FBgn0052413	CG32413	UPSTREAM	883
3L_5899328_SNP	T	C	C	0.08122	16	181	4.43736e-05	0.165084	0.00514717	FBgn0035647	CG10486	SYNONYMOUS_CODING	0
2L_6843026_SNP	A	C	A	0.3867	70	111	4.44004e-05	0.272198	0.00212967	INTERGENIC		INTERGENIC
3R_18253174_SNP	T	C	C	0.3105	59	131	4.44452e-05	0.571823	0.000342927	FBgn0038967	CG13847	NON_SYNONYMOUS_CODING	0
3L_4729070_SNP	T	G	G	0.2423	47	147	4.47108e-05	0.0863207	0.0127717	FBgn0035574	RhoGEF64C	INTRON	0
2R_7471477_SNP	A	G	G	0.1186	23	171	4.47507e-05	0.0691556	0.0166288	FBgn0033636	tou	SYNONYMOUS_CODING	0
3L_10906520_SNP	T	C	C	0.25	49	147	4.72724e-05	0.698837	0.000185051	INTERGENIC		INTERGENIC
2R_19110985_SNP	A	G	G	0.1173	23	173	4.72988e-05	0.0693787	0.0171416	INTERGENIC		INTERGENIC
3L_14295892_SNP	T	C	C	0.456	83	99	4.7688e-05	0.128589	0.00786254	FBgn0001085	fz	INTRON	0
2L_7041758_SNP	C	A	A	0.06915	13	175	4.835e-05	0.00711889	0.114741	FBgn0262872	milt	INTRON	0
X_20281971_SNP	T	C	C	0.1436	28	167	4.87178e-05	0.0691608	0.0175183	FBgn0031107	HERC2	SYNONYMOUS_CODING	0
2R_14039785_SNP	A	G	G	0.05025	10	189	4.88034e-05	0.316456	0.00168242	FBgn0000057	adp	SYNONYMOUS_CODING	0	FBgn0034304	CG5742	UPSTREAM	870
3L_7652595_SNP	A	T	A	0.09278	18	176	4.92957e-05	0.135189	0.00748473	FBgn0052373	CG32373	INTRON	0	FBgn0265084	CG44195	UTR_3_PRIME	0
3L_14295770_SNP	A	C	C	0.456	83	99	4.95833e-05	0.248387	0.00276307	FBgn0001085	fz	INTRON	0
2R_18403571_SNP	T	G	T	0.4468	84	104	4.97349e-05	0.0292973	0.0416621	FBgn0003175	px	INTRON	0
